# Supplementary material
Source: PubMed Central journal article supplement (PMC4270914)
Supplement: NIHMS632881-supplement-Supplemantal_Material.pdf [file NIHMS632881-supplement-Supplemantal_Material.pdf]

## **SUPPLEMENTAL MATERIAL**

**Supplemental Table 1. PARTNER Complication Definitions**

|                               |                                                                                                                                                                                                                                                                                                                                                                                                                                                                                                                                                                                                                                                                                                                     |
|-------------------------------|---------------------------------------------------------------------------------------------------------------------------------------------------------------------------------------------------------------------------------------------------------------------------------------------------------------------------------------------------------------------------------------------------------------------------------------------------------------------------------------------------------------------------------------------------------------------------------------------------------------------------------------------------------------------------------------------------------------------|
| Stroke (major)                | Focal neurologic deficit lasting $\geq 24$ hours or focal neurologic deficit lasting $< 24$ hours with imaging findings of acute infarction or hemorrhage Modified Rankin Scale of $\geq 2$ at $\geq 30$ days after the event                                                                                                                                                                                                                                                                                                                                                                                                                                                                                       |
| Stroke (minor)                | Acute stroke with Modified Rankin Scale of 0-1 at $\geq 30$ days                                                                                                                                                                                                                                                                                                                                                                                                                                                                                                                                                                                                                                                    |
| Myocardial infarction         | (1) acute MI demonstrated by autopsy, (2) emergent PCI performed for acute ST-elevation MI, (3) administration of thrombolytics for acute MI, (4) peri-procedural MI ( $\leq 7$ days post index procedure): new pathologic Q waves in $\geq 2$ leads with elevation of CK-MB; or documented signs or symptoms of ischemia or new ischemic changes on ECG and CK-MB elevation $> 10 \times \text{ULN}$ . (5) non-procedural MI ( $> 7$ days): new pathologic Q waves in $\geq 2$ contiguous leads with elevation of CK, CK-MB or troponin and signs or symptoms of myocardial ischemia; or elevation of CK $> 2 \times \text{ULN}$ with elevation of CK-MB or troponin and signs or symptoms of myocardial ischemia. |
| Vascular complication (major) | (1) any thoracic aortic dissection, (2) access site or access-related vascular injury (dissection, stenosis, perforation, rupture, arterio-venous fistula, pseudoaneurysm, hematoma, irreversible nerve injury, or compartment syndrome) leading to either death, need for significant blood transfusions ( $> 3$ units), unplanned percutaneous or surgical intervention, or irreversible end-organ damage (e.g., hypogastric artery occlusion causing visceral ischemia or spinal artery injury causing neurologic impairment), (3) distal embolization                                                                                                                                                           |

|                               |                                                                                                                                                                                                                                                                                                                                                                                        |
|-------------------------------|----------------------------------------------------------------------------------------------------------------------------------------------------------------------------------------------------------------------------------------------------------------------------------------------------------------------------------------------------------------------------------------|
|                               | (non-cerebral) from a vascular source requiring surgery or resulting in amputation or irreversible end-organ damage, or (4) left ventricular perforation.                                                                                                                                                                                                                              |
| Vascular complication (minor) | Vascular complication not meeting major criteria                                                                                                                                                                                                                                                                                                                                       |
| Renal insufficiency           | serum creatinine >3 mg/dL                                                                                                                                                                                                                                                                                                                                                              |
| Renal failure                 | need for renal replacement therapy                                                                                                                                                                                                                                                                                                                                                     |
| Major bleeding                | Clear site of bleeding that met any one of the following criteria: (1) caused death, (2) prolonged hospitalization $\geq 24$ hours due to treatment of bleeding, (3) required pericardiocentesis or procedure for repair or hemostasis, (4) caused permanent disability (e.g. blindness, paralysis, hearing loss), (5) required transfusion of >3 units of blood within 24 hour period |
| Arrhythmia                    | High-degree AV block, atrial fibrillation or flutter, or ventricular tachycardia                                                                                                                                                                                                                                                                                                       |
| Permanent pacemaker           | Arrhythmia requiring permanent pacemaker placement                                                                                                                                                                                                                                                                                                                                     |
| Repeat TAVR                   | Implantation of new percutaneous aortic valve                                                                                                                                                                                                                                                                                                                                          |
| Surgical AVR                  | Conversion to surgical aortic valve replacement                                                                                                                                                                                                                                                                                                                                        |

**Supplemental Table 2. Baseline characteristics and rates of complications among patients with vs. without billing data**

|                                       | <b>Billing Available<br/>n=406</b> | <b>Billing Not Available<br/>n=113</b> | <b>P-value</b> |
|---------------------------------------|------------------------------------|----------------------------------------|----------------|
| Age                                   | 83.5 ± 7.1                         | 83.2 ± 8.8                             | 0.748          |
| Female                                | 46.8%                              | 46.0%                                  | 0.883          |
| Prior bypass surgery                  | 40.4%                              | 34.5%                                  | 0.257          |
| Prior angioplasty                     | 32.2%                              | 27.4%                                  | 0.336          |
| Peripheral vascular disease           | 41.8%                              | 31.0%                                  | 0.038          |
| Creatinine (mg/dL)                    | 1.30 ± 0.47                        | 1.29 ± 0.49                            | 0.929          |
| Renal disease (Cr ≥2)                 | 16.7%                              | 25.9%                                  | 0.028          |
| Ejection fraction (%)                 | 52.9 ± 13.7                        | 53.0 ± 13.8                            | 0.967          |
| Ejection fraction <40%                | 16.0%                              | 18.6%                                  | 0.515          |
| Oxygen-dependent lung disease         | 11.8%                              | 18.6%                                  | 0.061          |
| Body mass index (kg/m <sup>2</sup> )  | 27.6 ± 7.7                         | 25.3 ± 5.2                             | 0.003          |
| Body mass index <20 kg/m <sup>2</sup> | 9.4%                               | 12.4%                                  | 0.343          |
| Diabetes mellitus                     | 38.2%                              | 40.7%                                  | 0.625          |
| Arrhythmia                            | 48.5%                              | 46.9%                                  | 0.761          |
| Hemoglobin (mg/dL)                    | 11.7 ± 1.6                         | 11.7 ± 1.6                             | 0.815          |
| Systolic blood pressure (mmHg)        | 127.6 ± 21.3                       | 126.4 ± 24.3                           | 0.601          |
| Mini Mental State Exam Score          | 26.8 ± 3.4                         | 26.6 ± 3.5                             | 0.669          |
| 6MWT attempted                        | 58.4%                              | 52.2%                                  | 0.242          |
| 6MWT distance (m)                     | 150.6 ± 106.0                      | 180.4 ± 119.9                          | 0.066          |
| NYHA class                            |                                    |                                        | <0.001         |
| 2                                     | 4.7%                               | 12.4%                                  |                |
| 3                                     | 40.9%                              | 55.8%                                  |                |
| 4                                     | 54.4%                              | 31.9%                                  |                |
| Mean aortic valve gradient            | 43.6 ± 14.8                        | 43.2 ± 14.7                            | 0.823          |
| Aortic valve area                     | 0.66 ± 0.20                        | 0.61 ± 0.19                            | 0.030          |
| STS Risk Score                        | 11.6 ± 4.1                         | 11.6 ± 5.1                             | 0.975          |
| Cohort A                              | 70.2%                              | 52.2%                                  | <0.001         |
| Transfemoral approach                 | 79.1%                              | 85.0%                                  | 0.163          |
| <b>In-hospital complications</b>      |                                    |                                        |                |
| Any complications                     | 44.6%                              | 64.6%                                  | <0.001         |
| Death                                 | 4.9%                               | 5.3%                                   | 0.869          |
| Major stroke                          | 3.2%                               | 3.5%                                   | 0.772          |
| Minor stroke                          | 1.2%                               | 1.8%                                   | 0.649          |
| Major vascular complication           | 11.6%                              | 17.7%                                  | 0.086          |

|                             |       |       |       |
|-----------------------------|-------|-------|-------|
| Minor vascular complication | 7.9%  | 10.6% | 0.355 |
| Major bleeding              | 9.9%  | 20.4% | 0.002 |
| Renal insufficiency         | 4.2%  | 7.1%  | 0.204 |
| Renal failure               | 2.7%  | 3.5%  | 0.750 |
| Arrhythmia                  | 16.3% | 21.2% | 0.216 |
| Permanent pacemaker         | 3.2%  | 6.2%  | 0.166 |
| Repeat TAVR                 | 0.5%  | 0.9%  | 0.522 |
| Surgical AVR                | 1.7%  | 0.9%  | 1.000 |

---

**Supplemental Table 3. Hospital costs attributable to specific complications of TAVR, within the TVT registry**

| <b>Complication</b>                | <b>Incremental Cost of Complication (\$)</b> | <b>Frequency in PARTNER</b> | <b>Frequency in TVT Registry</b> | <b>Attributable Cost (\$)</b> |
|------------------------------------|----------------------------------------------|-----------------------------|----------------------------------|-------------------------------|
| Death                              | \$42,008                                     | 5.01%                       | 5.54%                            | \$2,327                       |
| Major stroke                       | \$16,272                                     | 3.28%                       | 2.02%                            | \$329                         |
| Major bleeding                     | \$32,869                                     | 12.14%                      | 3.46%                            | \$1,138                       |
| Renal failure                      | \$68,051                                     | 2.89%                       | 1.88%                            | \$1,280                       |
| Arrhythmia                         | \$16,067                                     | 17.34%                      | 5.97%                            | \$959                         |
| Repeat TAVR                        | \$119,905                                    | 0.58%                       | 2.87%                            | \$3,437                       |
| Surgical AVR                       | \$26,070                                     | 1.54%                       | 1.22%                            | \$318                         |
| <b>Total cost of complications</b> |                                              |                             |                                  | <b>\$9,787</b>                |
